# Supplementary material for: The methyltransferase TrmA facilitates tRNA folding through interaction with its RNA-binding domain
Source: PubMed Central journal article supplement — Nucleic Acids Res. 2020 Jun 29;48(14):7981–90. doi: 10.1093/nar/gkaa548 (PMC7641329; doi:10.1093/nar/gkaa548), 2020-06-29
Supplement: gkaa548_supplemental_file.pdf [file gkaa548_supplemental_file.pdf]

## The methyltransferase TrmA facilitates tRNA folding through interaction with its RNA-binding domain

Laura Carole Keffer-Wilkes<sup>1</sup>, Emily F. Soon<sup>1</sup> and Ute Kothe\*

<sup>1</sup> contributed equally

### Supplemental Materials and Methods

**Table S1. Primers used for TrmA site-directed mutagenesis and PCR co-culture competition assay.**

| Primer Name            | Sequence                                                         |
|------------------------|------------------------------------------------------------------|
| TrmAQ190A sense        | 5' -GTAGAAAACAGCTTTACGGCGCCGAACGCGGCGATG-3'                      |
| TrmAQ190A antisense    | 5' -CATCGCCGCGTTCGGCGCCGTAAAGCTGTTTTCTAC-3'                      |
| TrmAG220D sense        | 5' -GGCGATTTACTCGAGCTGTAAGTGGGCAACGGTAAC-3'                      |
| TrmAG220D antisense    | 5' -GTTACCGTTGTTCGAGTACAGCTCGAGTAAATCGCC-3'                      |
| TrmAC324A sense        | 5' -<br>GTATCCGCGTATTTTGTACATCAGCGCTAACCCGGAAACGTTATGCAAG-<br>3' |
| TrmAC324A antisense    | 5' -<br>CTTGCATAACGTTTCCGGGTTAGCGCTGATGTACAAAATACGCGGATAC-<br>3' |
| TrmA E358Q sense       | 5' -CCTACACGCACCACATGCAGTGCAGCGGCGTATTAC-3'                      |
| TrmA E358Q antisense   | 5' -GTAATACGCCGCACATGCATGTGGTGCCTGTAGG-3'                        |
| TrmAR51A sense         | 5' -GGAGTTCGCCATATGGCACGATGGCGATG-3'                             |
| TrmAR51A antisense     | 5' -GTGCCATATGGCGAACTCCGCGCGCATCC-3'                             |
| TrmA F106A sense       | 5' -CACAAAGCTTGCCAGATTGATTACCTCAC-3'                             |
| TrmA F106A antisense   | 5' -AATCTGGGCAAGCTTGTGGCGCAGAACGG-3'                             |
| TrmA H125A sense       | 5' -CTATACGCTAAGAAGCTTGATGATGAGTGG-3'                            |
| TrmA H125A antisense   | 5' -TCAAGCTTCTTAGCGTATAGCAGGGAAACC-3'                            |
| TrmA pTrc99a sense     | 5' -ACTAATCCC <u>ATGGATG</u> ACCCCCGAACACCTT-3'                  |
| TrmA pTrc99a antisense | 5' -AATGTTATAAGCTTTTACTTCGCGGTCAGTAATACG-3'                      |

**Table S2: PCR conditions for engineering TrmA variants.**

| Step                    | Temperature (°C) | Time, Cycles          |
|-------------------------|------------------|-----------------------|
| Initial denaturation    | 98               | 30 seconds, 1 cycle   |
| Denaturation            | 98               | 10 seconds, 20 cycle* |
| Annealing and Extension | 72               | 9 minutes, 20 cycles* |
| Final extension         | 72               | 9 minutes, 1 cycle*   |

\* For variant TrmA R51A denaturation, annealing and extension were completed for 30 cycles. Additionally, the annealing and extension step was 3 minutes and 30 seconds.

**Table S3: PCR conditions for amplification of the trmA gene in the co-culture competition assay.**

| Step                 | Temperature (°C) | Time, Cycles          |
|----------------------|------------------|-----------------------|
| Initial denaturation | 95               | 5 minutes, 1 cycle    |
| Denaturation         | 95               | 20 seconds, 16 cycles |
| Annealing            | 55               | 20 seconds, 16 cycles |
| Extension            | 72               | 2 minutes, 16 cycles  |
| Final extension      | 72               | 10 minutes, 1 cycle   |

**Table S4: PCR protocol for amplification of tRNA<sup>Phe</sup> gene.**

| Step                       | Temperature (°C)                                   | Time, Cycles                                                                     |
|----------------------------|----------------------------------------------------|----------------------------------------------------------------------------------|
| Initial denaturation       | 95                                                 | 5 minutes, 1 cycle                                                               |
| Denaturation and annealing | 1. 95<br>2. 45 (increase 1°C each repeat)<br>3. 72 | 1. 30 seconds, 6 cycles<br>2. 30 seconds, 6 cycles<br>3. 20 seconds, 6 cycles    |
| Extension                  | 1. 95<br>2. 50<br>3. 72                            | 1. 30 seconds, 29 cycles<br>2. 30 seconds, 29 cycles<br>3. 20 seconds, 29 cycles |
| Final extension            | 72                                                 | 11 minutes, 1 cycle                                                              |

**Table S5: Dissociation constants for tRNA and/or SAM binding by TrmA and variants.**

| TrmA variant | $K_D$ , $\mu\text{M}$  |                              |                       |                              |
|--------------|------------------------|------------------------------|-----------------------|------------------------------|
|              | [ <sup>3</sup> H]-tRNA | [ <sup>3</sup> H]-tRNA + SAM | [ <sup>3</sup> H]-SAM | [ <sup>3</sup> H]-SAM + tRNA |
| Wild-type    | 0.02 ± 0.01            | 0.66 ± 0.11*                 | 17 ± 2                | 27 ± 6                       |
| C324A        | 1.08 ± 0.16            | 0.03 ± 0.02                  | 24 ± 11               | 0.15 ± 0.06                  |
| E358Q        | 0.07 ± 0.04            | 0.011 ± 0.007                | 14 ± 3                | 0.38 ± 0.21                  |
| Q190A        | 0.28 ± 0.10            | 1.5 ± 0.2*                   | 75 ± 52               | 0.39 ± 0.15                  |
| G220D        | 0.22 ± 0.05            | 0.06 ± 0.03                  | no binding            | no binding                   |
| R51A         | 0.14 ± 0.07            | 1.15 ± 0.34*                 | 9 ± 3                 | 6 ± 3                        |
| R51AC324A    | 2.8 ± 0.7              | 0.16 ± 0.06                  | 17 ± 5                | 0.78 ± 0.70                  |
| F106A        | 1.0 ± 0.4              | 2 ± 1*                       | 6 ± 2                 | 2 ± 1                        |
| F106AC324A   | 18 ± 7                 | 6 ± 2                        | 56 ± 34               | 10 ± 7                       |
| H125A        | 4 ± 3                  | 6 ± 2*                       | 20 ± 5                | 2 ± 1                        |
| H125AC324A   | 47 ± 27                | 3 ± 1                        | 13 ± 9                | 5 ± 2                        |

\*TrmA variants that are active in tRNA methylation will form methylated tRNA when incubated with both tRNA and an excess of SAM. In these cases, the binding of methylated tRNA, i.e. the product of TrmA, is observed rather than binding of unmodified substrate tRNA.

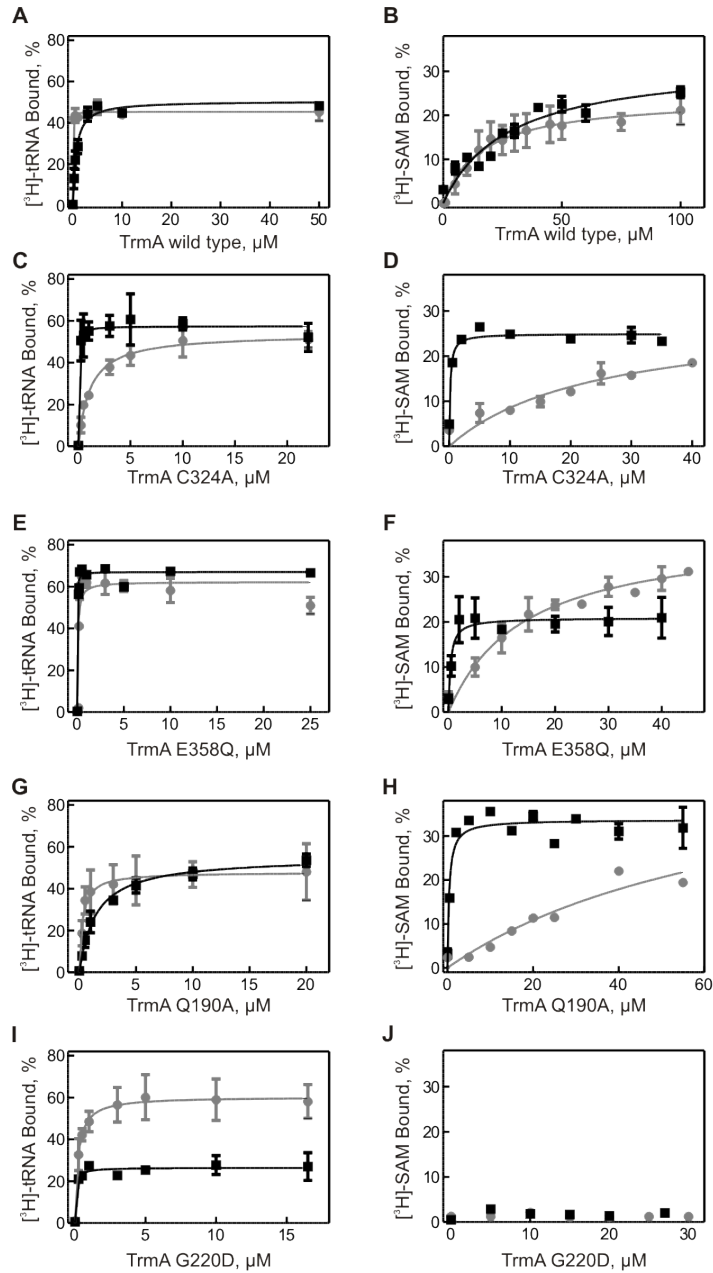

**Figure S1. Ligand binding analysis of TrmA wild-type and active site variants.**

Nitrocellulose filter binding assays were completed with 50 nM  $^3\text{H}$ - tRNA (left panels: A, C, E, G, I) or 50 nM  $^3\text{H}$ -SAM (right panels: B, D, F, H, J). Increasing concentrations of enzyme were titrated into the radioactive ligand either in the presence (black squares) or absence (grey circles) of the other ligand. Different TrmA variants were tested: TrmA wild-type (A & B), TrmA C324A (C & D), TrmA E358Q (E & F), TrmA Q190A (G & H), and TrmA G220D (I & J). Following a short incubation, reaction mixtures were filtered and washed with cold buffer. The retained radioactivity was quantified via scintillation counting. The percentage of bound substrate was plotted against enzyme concentration and fitted with a hyperbolic curve (smooth lines). The dissociation constant for each enzyme is reported in Table 4.4.

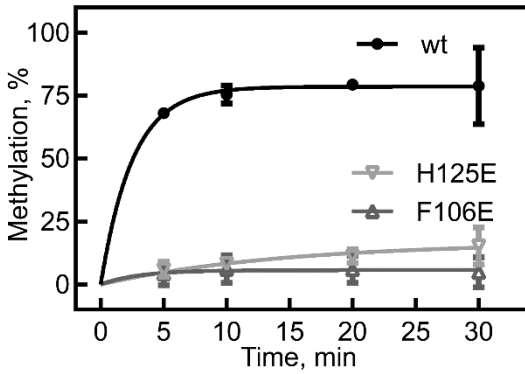

**Figure S2: Methylation activity of TrmA wt and variants under high protein concentrations.** Single turn-over methylation with increased concentrations of TrmA wt and TrmA tRNA binding variants (20  $\mu$ M for all TrmA wt and F106E, 8.8  $\mu$ M for TrmA H125E), 50  $\mu$ M SAM and 600 nM tRNA: TrmA wt (black circles), H125E (open inverted light grey triangles), and F106E (open grey triangles).

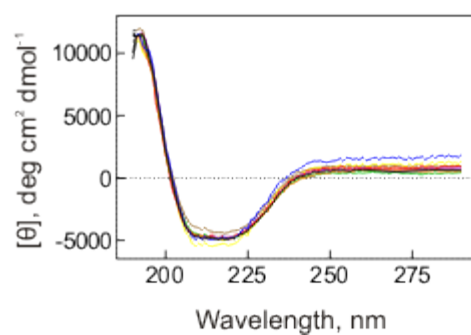

**Figure S3. Circular dichroism spectroscopy of TrmA variants with substitutions near the active site.** No substantial changes in structure for the TrmA variants compared to wild-type were revealed as ellipticity remained relatively unaffected between wild type and all variants. TrmA wild-type (solid black line), C324A (blue), E358Q (orange), Q190A (green), G220D (red), R51A (purple), F106A (yellow), and H125A (brown) were diluted in 50 mM sodium phosphate buffer, pH 7.5, to 1  $\mu$ M prior to being scanned.

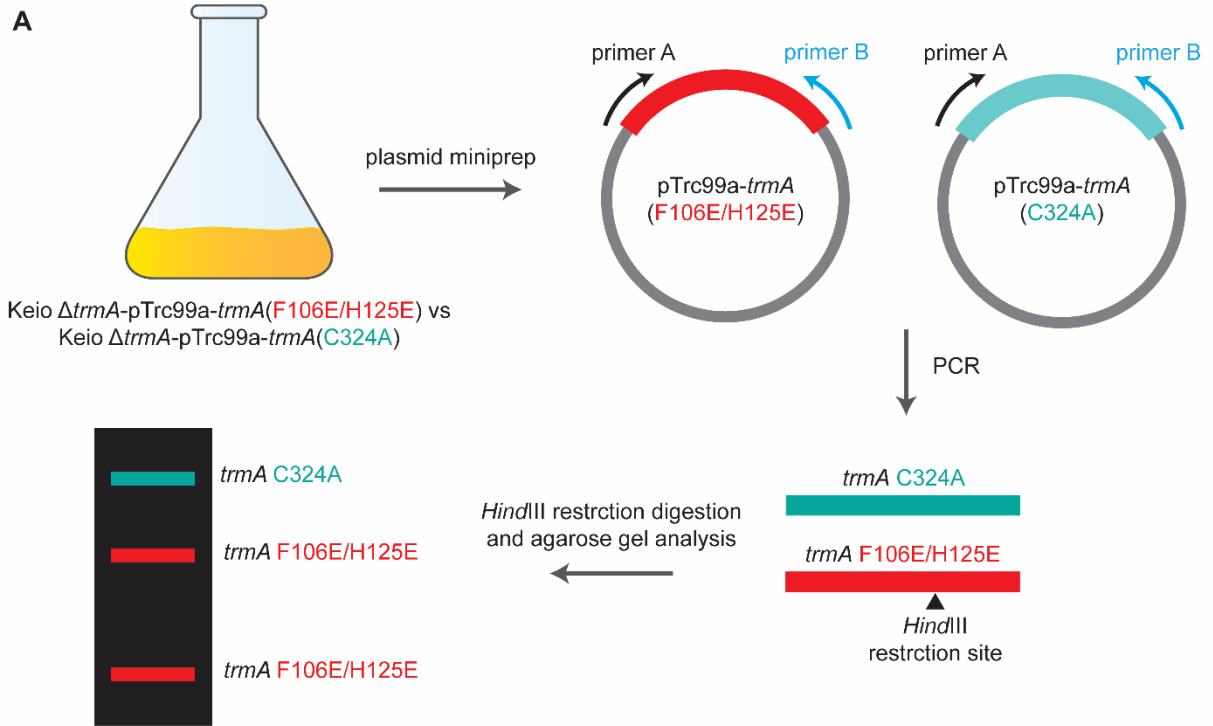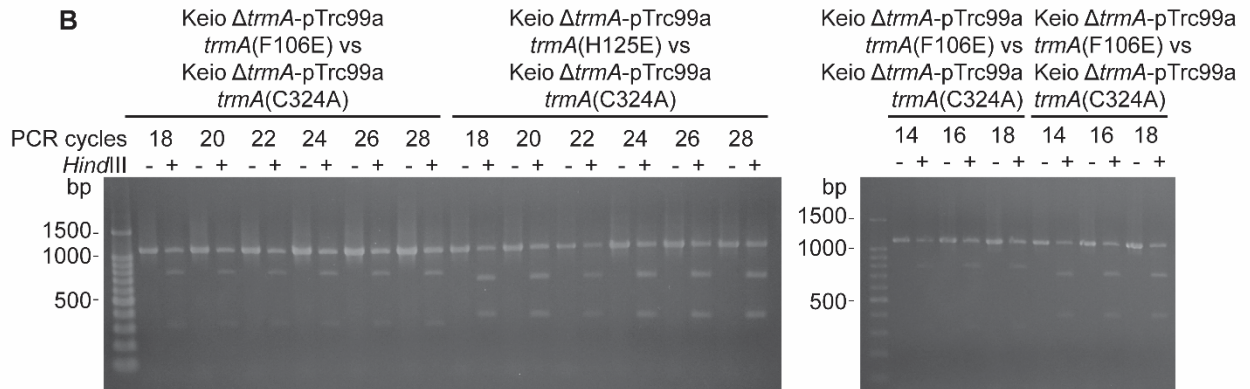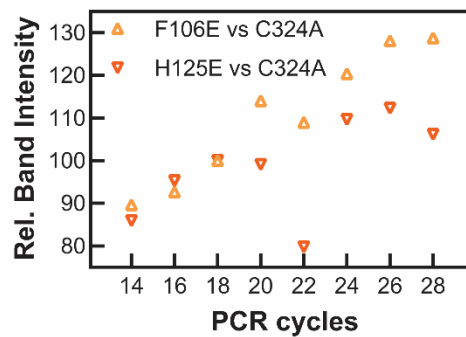

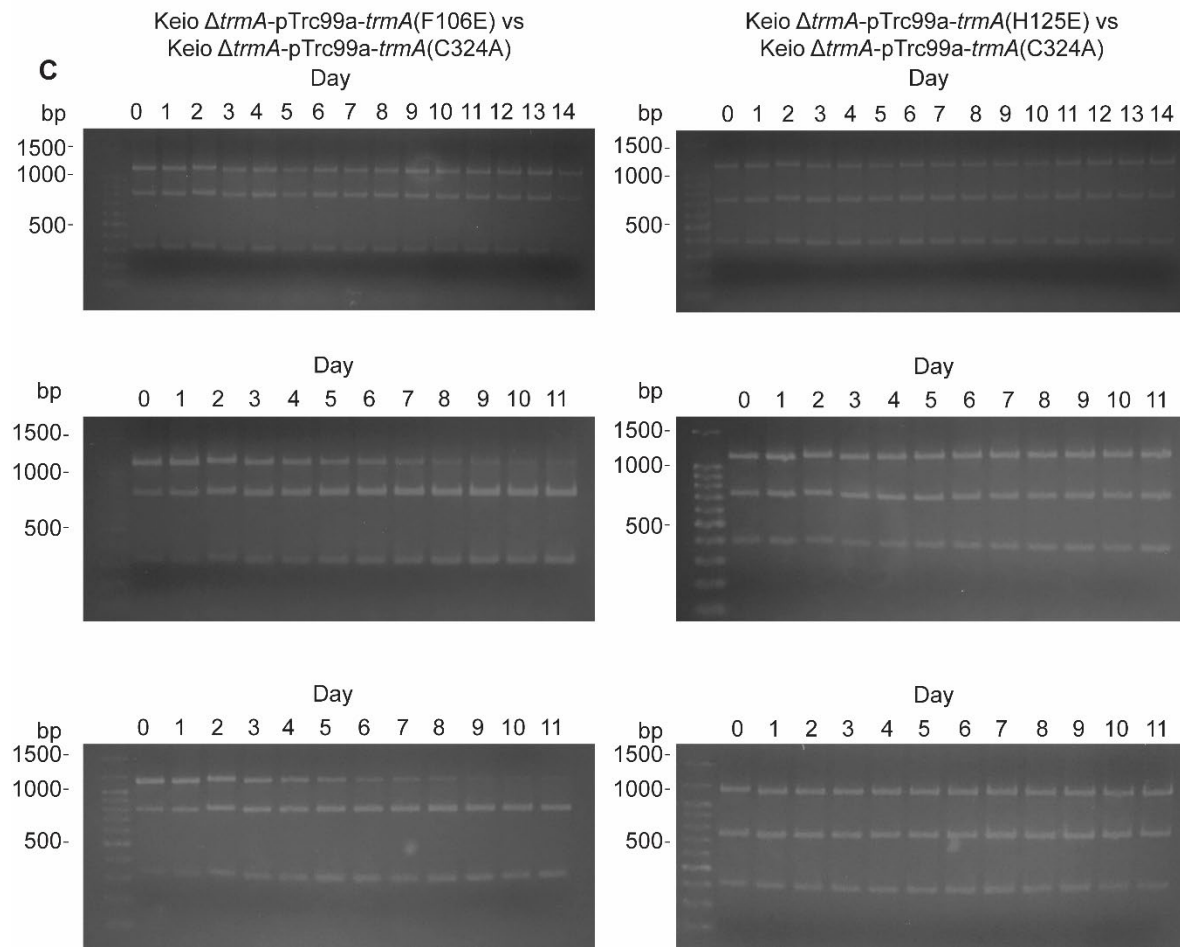

**Figure S4. PCR-based co-culture competition assay to assess the relative contribution of tRNA binding and catalytic activity by TrmA to bacterial fitness.** **A** Schematic depiction of PCR-based analysis of co-culture competition assays. The plasmids bearing either the TrmA binding variants (F106E or H125E) or the catalytically inactive variant (C324A) were isolated from the co-culture of *E. coli* strains expressing TrmA C324A and TrmA F106E or H125E. The same primer set is used to PCR amplify *trmA* from the plasmids. Subsequently, the PCR products are subjected to *Hind*III digestion and agarose gel analysis to distinguish between *trmA* C324A (no *Hind*III site) and *trmA* F106E/H125E (one *Hind*III site). Ratios of band intensities between the catalytically inactive and binding variant are determined by ImageJ analysis. **B** Assessing the number of PCR cycles on product yield. The band intensities of the PCR products were normalized relative to the band intensity observed for 18 cycles in each gel and plotted against the PCR cycle number showing that the PCR is not saturated at 16 cycles used in the further analysis. **C** PCR and restriction-based analysis of the bacterial co-culture competition between *E. coli*  $\Delta trmA$  strains expressing TrmA C324A and TrmA F106E (left panels) or H125E (right panels). The samples were processed as described in **A** and the band intensity ratios of the *trmA* C324A:*trmA* F106E/H125E bands are depicted in Figure 4B.
